# Supplementary material for: Detection and Molecular Phylogenetic-Morphometric Characterization of Rhizoctonia tuliparum, Causal Agent of Gray Bulb Rot of Tulips and Bulbous Iris
Source: MDPI journal article supplement (doi:10.3390/jof8020163), 2022-02-08

**Figure S2.** *Rhizoctonia tuliparum* isolated from bulbous iris and grown on potato dextrose agar produced “lab-grown” sclerotia that were slightly different in appearance (left) from a mixture of “natural light” and “natural dark” sclerotia of *R. tuliparum* (right) that were collected directly from soil around diseased iris bulbs.

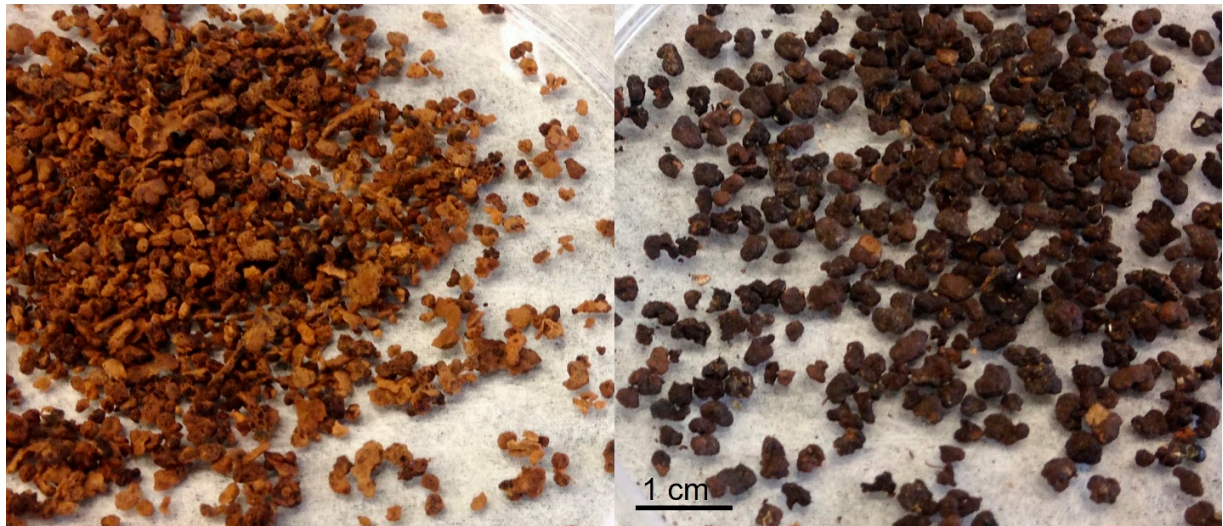

Supplement: s1 [file s1]
