# Supplementary material for: Detection and Molecular Phylogenetic-Morphometric Characterization of Rhizoctonia tuliparum, Causal Agent of Gray Bulb Rot of Tulips and Bulbous Iris
Source: MDPI journal article supplement (doi:10.3390/jof8020163), 2022-02-08
Supplement: s1 [file s1]

**Table S2.** Base-pairing in the ITS2 RNA secondary structures of varieties of *R. tuliparum* Washington isolate (KX767078) in comparison to that of *Ceratobasidium anceps* (MH855251).

|                       | <b>Mutation in Helix I</b> | <b>Effect on helix I</b>     | <b>Mutation in Helix II</b> | <b>Effect on helix II</b> | <b>Mutation in Helix III</b>        | <b>Effect on helix III</b>   | <b>Mutation in Helix IV</b> | <b>Effect on helix IV</b> |
|-----------------------|----------------------------|------------------------------|-----------------------------|---------------------------|-------------------------------------|------------------------------|-----------------------------|---------------------------|
| KX767078 (Washington) |                            | No gain/loss of base pairing | A-U → G-C                   | CBC                       | Loss of one U-A and two G-C pairs   | Net loss of three base pairs | U-A deletion                | Loss of one base pair     |
|                       |                            |                              | G-U → G-C                   | hCBC                      | Maintained the pseudoknot structure |                              |                             |                           |
