# Supplementary material for: Detection and Molecular Phylogenetic-Morphometric Characterization of Rhizoctonia tuliparum, Causal Agent of Gray Bulb Rot of Tulips and Bulbous Iris
Source: MDPI journal article supplement (doi:10.3390/jof8020163), 2022-02-08
Supplement: s1 [file s1]

**Figure S1.** Selected *Rhizoctonia*, *Waitea* and *Ceratobasidium* sequences from the alignment file for the ITS region for designing primers and probes for the quantitative PCR diagnostic assay for detection and quantification of *Rhizoctonia tuliparum*. Only the sequences of *Rhizoctonia tuliparum* (synonym *Sclerotium tuliparum*) showed the presence of all three primers.

[Forward primer – Probe – Reverse primer sequences are highlighted

```
>AF308621. Rhizoctonia solani, AG2-2 WB, isolate A4
CAATTGGTTTCACTTTGGTATTGGAGGTCTTGCAGCTTCACATGCTGC
TCCTCTTTGTTCACTAGCTGGATCTCGGTGTTATGCTTGGTTCCACTCGG

>AB122124. Rhizoctonia solani, AG 2-1, isolate B-1
CAATTGGTTTCACTTTGGTATTGGAGGTCTTTTGCAGCTTCACACCTGCT
CCTCTTTGTGCATTAGCTGGATCTCAGTGTTATGCTTGGTTCCACTCGG

>AB054849. Rhizoctonia solani, AG-2-1, isolate 88-033
CAATTGGTTTCACTTTGGTATTGGAGGTCTTTTGCAGCTTCACACCTGCT
CCTCTTTGTTCACTAGCTGGATCTCAGTGTTATGCTTGGTTCCACTCGG

>DQ356411. Rhizoctonia solani, AG-2-1, isolate Rh 120208
CAATTGGTTTCACTTTGGTATTGGAGGTCTTTTGCAGCTTCACACCTGCT
CCTCTTTGTTCACTAGCTGGATCTCAGTGTTATGCTTGGTTCCACTCGG

>DQ356412. Rhizoctonia solani, AG-2-1, isolate Rh 1202325
CAATTGGTTTCACTTTGGTATTGGAGGTCTTTTGCAGCTTCACACCTGCT
CCTCTTTGTTCACTAGCTGGATCTCAGTGTTATGCTTGGTTCCACTCGG

>AF354105. Rhizoctonia solani, AG-2-1, isolate 56Rs
CAATTGGTTTCACTTTGGTATTGGAGGTCTTTTGCAGCTTCACACCTGCT
CCTCTTTGTTCACTAGCTGGATCTCAGTGTTATGCTTGGTTCCACTCGG

>AF354063. Rhizoctonia solani, AG-2-1, isolate 8Rs
CAATTGGTTTCACTTTGGTATTGGAGGTCTTTTGCAGCTTCACACCTGCT
CCTCTTTGTTCACTAGCTGGATCTCAGTGTTATGCTTGGTTCCACTCGG

>DQ356408. Rhizoctonia solani, AG-10, isolate Rh 100278
CAATTGGGTTGACTTTGGTATTGGAGGTCTTGCAGGTTCACTTGCTCC
TCTTTGTGCATTAGCTGGATCTCAGTGTTATGCTTGGTTCCACTCGG

>AY154318. Rhizoctonia solani, AG-10
CAATTGGGTTGACTTTGGTATTGGAGGTCTTGCAGGTTCACTTGCTCC
TCTTTGTGCATTAGCTGGATCTCAGTGTTATGCTTGGTTCCACTCGG

>AB019026. Rhizoctonia solani, AG-10, isolate Rh 76107
CAATTGGGTTGACTTTGGTATTGGAGGTCTTGCAGGTTCACTTGCTCC
TCTTTGTGCATTAGCTGGATCTCAGTGTTATGCTTGGTTCCACTCGG

>DQ356410. Rhizoctonia solani, AG-10, isolate Rh 120203
CAATTGGGTTGACTTTGGTATTGGAGGTCTTGCAGGTTCACTTGCTCC
```

TCTTTGTGCATTAGCTGGATCTCAGTGTTATGCTTGGTTCCACTCGG

>AF153800. *Rhizoctonia solani*, AG-10, isolate 93017  
CAATTGGGTTGACTTTGGTATTGGAGGTCTTGCAGGTTACACTTGCTCC

TCTTTGTGCATTAGCTGGATCTCAGTGTTATGCTTGGTTCCACTCGG

>DQ356413. *Rhizoctonia solani*, AG-8, isolate Rh 070304  
CAATTGGTTCTACTTTGGTATTGGAGGTCTTTGCAGCTTCACACCTGCT  
CCTCTTTGTGCATTAGCTGGATCTCAGTGTTATGCTTGGTTCCACTCAG

>AF354067. *Rhizoctonia solani*, AG-8, isolate (ZG1-2)SA50  
CAATTGGTTCTACTTTGGTATTGGAGGTCTTTGCAGCTTCACACCTGCT  
CCTCTTTGTGCATTAGCTGGATCTCAGTGTTATGCTTGGTTCCACTCAG

>AF354068. *Rhizoctonia solani*, AG-8, isolate (ZG1-3)SA1512  
CAATTGGTTCTACTTTGGTATTGGAGGTCTTTGCAGCTTCACACCTGC  
TCCTCTTTGTGCATTAGCTGGATCTCAGTGTTATGCTTGGTTCCACTCAT

>KX767078. *Sclerotium tuliparum*, isolate I-399  
CGAGGTCGACTTTTGTGTTGGACTTGGAGGCCTTGCGGATTCACGTCC  
GCTCCTCTCAACACATTAGCTGGATCTCAGTGAACCTCGGTTCCACTCGG

>KX767079. *Sclerotium tuliparum*, isolate DGF2-VV  
CGAGGTCGACTTTTGTGTTGGACTTGGAGGCCTTGCGGATTCACGTCC  
GCTCCTCTCAACACATTAGCTGGATCTCAGTGAACCTCGGTTCCACTCGG

>KX767080. *Sclerotium tuliparum*, isolate DGF3-Car  
CGAGGTCGACTTTTGTGTTGGACTTGGAGGCCTTGCGGATTCACGTCC  
GCTCCTCTCAACACATTAGCTGGATCTCAGTGAACCTCGGTTCCACTCGG

>EU191041. *Sclerotium tuliparum*, isolate 29792  
CGAGGTCGACTTTTGTGTTGGACTTGGAGGCCTTGCGGATTCACGTCC  
GCTCCTCTCAACACATTAGCTGGATCTCAGTGAACCTCGGTTCCACTCGG

>MH854847. *Sclerotium tuliparum*, strain CBS 206.25  
CGAGGTCGACTTTTGTGTTGGACTTGGAGGCCTTGCGGATTCACGTCC  
CCTCCTCTCAACACATTAGCTGGATCTCAGTGAACCTCGGTTCCCTCGG

>DQ102426. *Ceratobasidium* sp. AG-A isolate Str75  
CAATTGGCCTTGCTTTGGATTGGAGGTCTTGCAGATGTCACAGTCTGCT  
CCTCTAAATGAATTAGCTGGATCTCAGTATACTTGGTTCCACTCGG

>AJ242882. *Rhizoctonia* sp., strain Eab-S2  
CGATTGATTTATTTGGACTTGGGGTCTGCAGATTCACGTCTGCTCCC  
CTTAAATTCATTAGCTGGATCACTGTAGACTCGGTTCCACTCGG

>AJ242884. *Rhizoctonia* sp., strain Eab-S4  
CGATTGATTTATTTGGACTTGGGGTCTGCAGATTCACGTCTGCTCCC  
CTTAAATTCATTAGCTGGATCACTGTAGACTCGGTTCCACTCGG

>DQ102442. *Ceratobasidium* sp. AG-I, isolate lbs1  
CGATCGATTTTATTTGGACTTGGAGGTCTGCAGATTCACGTCTGCTCCT  
CTTAAATTCATTAGCTGGATCTGTATGAACTCGGTTCCACTCGG

>AJ419932. *Rhizoctonia* sp., strain AV-2  
CGATCGATTTTATTTGGACTTGGAGGTCTGCAGATTCACGTCTGCTCCT  
CTTAAATTCATTAGCTGGATCTGTATGAACTCGGTTCCACTCGG

>AB196650. *Ceratobasidium* sp. AG-I, strain AV-2  
CGATCGATTTTATTTGGACTTGGAGGTCTGCAGATTCACGTCTGCTCCT  
CTTAAATTCATTAGCTGGATCTGTATGAACTCGGTTCCACTCGG

>DQ356407. Uncultured *Ceratobasidiaceae*, isolate Rh100249  
CGATTGGTTTTATTTGGACTTGGGGGTCTGCAGATTCACGTCTGCTCCC  
CTTAAATTCATTAGCTGGATCACTGTAGACTCGGTTCCACTCGG

>DQ356409. Uncultured *Ceratobasidiaceae*, isolate Rh 1202334  
CGATTGGTTTTATCTTGGACTTGGGGGTCTGCAGATTCACGTCTGCTCCC  
CTTAAATTCATTAGCTGGATCACTGTAGACTCGGTTCCACTCGG

>AB213577. *Waitea circinata* var. *agrostis*, isolate TOM-BFW  
AATTGTTGTGTTTGGACTTGGAAGCTGTTGGCGCAAGTCAACTCTTCTTA  
  
AATGTATTAGCTGGGGTTTATATAGTTGGATCCTTGG

>AB213596. *Waitea circinata* var. *zeae*, isolate Rz-1-sh  
AATTATTGTGTTTGGACTTGGAAGCTTGTCGGCGCAAGTCGACTCTTCTT  
  
AAATGCATTAGCTGGGGTTTATATAGTTGGATCCTTGG

>AB213591. *Waitea circinata* var. *oryzae*, isolate Ro119: Aichi  
GAATCATTATTATTTGGACTTGGAAGTTTGTCGGCGCAAGTCGACTCTTC  
  
TTAAATGCATTAGCTGGGGTTTATATAGTTGGATCCTTGG

>DQ356414. *Waitea circinate*, isolate Rh 120232  
GTTTTTGTGTTTGGACTTGGAAGCTGTCGGCGCAAGTCGACTCTTCTTAA  
  
ATGCATTAGCTGGGGTTTATATAGTTGGATCCTTGG

>DQ356415. *Waitea circinate*, isolate Ro4-4  
TTAATTGTTGTATTTGGACTTGGAAGCTGTTGGCGCAAGTCGACTCTTCT  
  
CAAATTCATTAGCTGGGGTTTATATAGTTGGATCCTTGG

>AB213584. *Waitea circinata* var. *circinata*, isolate AMI-BG  
GATTGTTGTATTTGGACTTGGAAGCTGTTGGCGCAAGTCGACTCTTCTCA  
  
AATGTATTAGCTGGGGTTTATATAGTTGGATCCTTGG

>AF222799. *Waitea circinate*, isolate RZ01  
GATTGTTGTATTTGGACTTGGAAGCTGTTGGCGCAAGTCGACTCTTCTCA  
  
AATGTATTAGCTGGGGTTTATATAAGTTGGATCCTTGG

>DQ356416. *Waitea circinate*, isolate Rh 0801344  
GATTGTTGTATTTGGACTTGGAAGCTGTTGGCACAAGTCGACTCTTCTCA

AATGTATTAGCTGGGGTTTATATAGTTGGATCCTTGG

>DQ356417. *Waitea circinate*, isolate Rh 0801387  
GATTGTTGTATTTGGACTTGGAAGCTGTTGGCGCAAGTCGACTCTTCTCA

AATGTATTAGCTGGGGTTTATATAGTTGGATCCTTGG

>MH855251. *Ceratobasidium anceps*, strain CBS 152.32  
CGAGGTCGACTTTTGTGTTTGGACTTGAGGCTTGCAGATTTCACGTTTGC

TCCTCTCAAATAAATTAGCTGGATCTCCGTGAACTCGGTTCCACTCGG

>AJ427402. *Ceratobasidium anceps*, isolate CBS 152.32  
CGAGGTCGACTTTTGTGTTTGGACTTGAGGCTTGCAGATTTCACGTTTGC

TCCTCTCAAATAAATTAGCTGGATCTCCGTGAACTCGGTTCCACTCGG

>KF386035, *Rhizoctonia butinii*, isolate 11026  
CAACTGGTTTTGTTTGGACTTGAGGTCTTGCGATTACGTCTGCTCC

TCTTAAAAATATTAGCTGGATCTCAGTGAACTCGGTTCCACTCGG

>MH855815, *Rhizoctonia floccose*, strain CBS 336.36  
CGGCTGACTTTGTTTGGACTTGAGGTCTTGCGATTACGTCTGCTCC

TCTTAAAAGCATTAGCTGGATCTCAGTGAGCTCGGTTCCACTCGG
