# Supplementary material for: Detection and Molecular Phylogenetic-Morphometric Characterization of Rhizoctonia tuliparum, Causal Agent of Gray Bulb Rot of Tulips and Bulbous Iris
Source: MDPI journal article supplement (doi:10.3390/jof8020163), 2022-02-08
Supplement: s1 [file s1]

**Table S3.** The conserved terminal loop sequences in all isolates of *Ceratobasidium anceps* (MH855251 and AJ427402), and *Rhizoctonia tuliparum* (KX767078, EU191041, and MH854847).

|                                                               | Loop I | Loop II | Loop III | Loop IV |
|---------------------------------------------------------------|--------|---------|----------|---------|
| Conserved Sequences in <i>C. anceps</i> & <i>R. tuliparum</i> | AUU    | CAC     | AAGU     | UAG     |
