# Supplementary material for: Detection and Molecular Phylogenetic-Morphometric Characterization of Rhizoctonia tuliparum, Causal Agent of Gray Bulb Rot of Tulips and Bulbous Iris
Source: MDPI journal article supplement (doi:10.3390/jof8020163), 2022-02-08
Supplement: s1 [file s1]

**Table S1.** The ITS2 sequence length and base composition of *C. anceps* and three *R. tuliparum* isolates.

|                                   | <b>Bases</b> | <b>A</b> | <b>A%</b> | <b>T</b> | <b>T%</b> | <b>G</b> | <b>G%</b> | <b>C</b> | <b>C%</b> | <b>GC%</b> |
|-----------------------------------|--------------|----------|-----------|----------|-----------|----------|-----------|----------|-----------|------------|
| MH855251 ( <i>C. anceps</i> )     | 237          | 66       | 27        | 70       | 31        | 51       | 21        | 50       | 21        | 42.6       |
| KX767078<br>(Washington<br>state) | 238          | 60       | 25        | 68       | 30        | 53       | 22        | 57       | 23        | 46.2       |
| EU191041<br>(Europe)              | 238          | 61       | 25        | 68       | 30        | 53       | 22        | 56       | 23        | 45.8       |
| MH854847<br>(Whetzel)             | 238          | 62       | 26        | 67       | 30        | 52       | 21        | 57       | 23        | 45.8       |
