# Supplementary material for: Detection and Molecular Phylogenetic-Morphometric Characterization of Rhizoctonia tuliparum, Causal Agent of Gray Bulb Rot of Tulips and Bulbous Iris
Source: MDPI journal article supplement (doi:10.3390/jof8020163), 2022-02-08
Supplement: s1 [file s1]

**Table S5.** Presence or absence of pseudoknot structures in helix III of *Ceratobasidium* binucleate and uninucleate isolates within the greater clade containing *Rhizoctonia tuliparum* in Fig. 6.

| Anastomosis Group*                      | GenBank Accession No. | Pseudoknot present (+) / absent (-) | AG group <sup>s</sup> |
|-----------------------------------------|-----------------------|-------------------------------------|-----------------------|
| A                                       | DQ102417              | +                                   | 1                     |
| Ba                                      | AB286930              | +                                   | 5                     |
| Bb                                      | AB122144              | +                                   | 5                     |
| B(o)                                    | AB219143              | +                                   | 5                     |
| C                                       | AB290021              | +                                   | 6                     |
| D ( <i>C. cereale</i> )                 | JQ768017              | +                                   | 4                     |
| E                                       | AF354083              | -                                   | 3                     |
| Fa                                      | DQ102434              | -                                   | 3                     |
| Fb                                      | AB219145              | -                                   | 3                     |
| G                                       | DQ102395              | +                                   | 2                     |
| H                                       | AF354089              | +                                   | 6                     |
| I                                       | AB290022              | +                                   | 6                     |
| K                                       | AB286932              | -                                   | 1                     |
| L                                       | AB286934              | +                                   | 2                     |
| O                                       | AF354094              | -                                   | 2                     |
| P                                       | AB286940              | -                                   | 3                     |
| Q                                       | AF354095              | +                                   | 5                     |
| R                                       | AB219146              | -                                   | 3                     |
| S                                       | AF354084              | -                                   | 3                     |
| U                                       | HQ269825              | -                                   | 3                     |
| UNR1*                                   | AF472295              | +                                   |                       |
| UNR1*                                   | AF472278              | +                                   |                       |
| UNR2*                                   | AF200515              | -                                   |                       |
| UNR2*                                   | AF200517              | -                                   |                       |
| <i>C. anceps</i> <sup>@</sup>           | MH855251              | +                                   |                       |
| <i>C. fluccosa</i> <sup>@</sup>         | MH855815              | +                                   |                       |
| <i>R. alpina</i> <sup>@</sup>           | MH855685              | +                                   |                       |
| <i>R. butini</i> <sup>@</sup>           | KP334098              | +                                   |                       |
| <i>C. pseudocornigerum</i> <sup>@</sup> | MH861653              | +                                   |                       |
| <i>C. noxium</i> <sup>@</sup>           | EU810056              | +                                   |                       |

\*Uninucleate *Ceratobasidium* isolate group 1 and group 2 per Sharon et al., (2008); <sup>s</sup>Per Sharon et al. (2008), AG group 1: -A and -K; AG group 2: -G, -L, and -O; AG group 3: -E, -F, -P (and -U), -R, and -S; AG group 4: AG-D; AG group 5: -B (including its three subgroups) and -Q; AG group 6: -C, -H, and -I; *Ceratobasidium* species grouped in a larger clade containing the *R. tuliparum* isolates.
