# Supplementary material for: Detection and Molecular Phylogenetic-Morphometric Characterization of Rhizoctonia tuliparum, Causal Agent of Gray Bulb Rot of Tulips and Bulbous Iris
Source: MDPI journal article supplement (doi:10.3390/jof8020163), 2022-02-08
Supplement: s1 [file s1]

**Table S6.** GenBank Accessions of the ITS (ITS1-5.8S-ITS2) regions showing complete sequence match with the Q-PCR Probe\* to detect *Rhizoctonia tuliparum*.

| GenBank Accession         | Genus/species                                       | Isolate/strain /clone | Source/host                     | Country     |
|---------------------------|-----------------------------------------------------|-----------------------|---------------------------------|-------------|
| <a href="#">MH854847</a>  | <i>Sclerotium tuliparum</i>                         | CBS 206.25            | Tulip                           | NY, USA     |
| <a href="#">EU191041</a>  | <i>S. tuliparum</i>                                 | 29792                 | Iris                            | Netherlands |
| <a href="#">KX767078</a>  | <i>S. tuliparum</i>                                 | I-399                 | Iris                            | WA, USA     |
| <a href="#">KX767079</a>  | <i>S. tuliparum</i>                                 | DGF2-VV               | Iris                            | WA, USA     |
| <a href="#">KX767080</a>  | <i>S. tuliparum</i>                                 | DGF3-Car              | Iris                            | WA, USA     |
| <a href="#">LC597348</a>  | Ceratobasidiaceae sp.                               | CE22_F499             | <i>Phalaenopsis japonica</i>    | Japan       |
| <a href="#">MT236771</a>  | Uncultured fungus                                   | 4248_679              | irrigation water from the pond  | Lithuania   |
| <a href="#">MH861653</a>  | <i>Ceratobasidium pseudocornigerum</i>              | CBS 568.83            | <i>Pterostylis mutica</i>       | Australia   |
| <a href="#">NR_154601</a> | <i>C. angustisporum</i>                             | CBS 568.83            | <i>P. mutica</i>                | Australia   |
| <a href="#">LC384936</a>  | <i>Rhizoctonia</i> sp. ( <i>Ceratobasidium</i> sp.) | MAFF 411008           | <i>Fagus crenata</i>            | Japan       |
| <a href="#">MG252920</a>  | Uncultured Ceratobasidiaceae                        | OUT_22                | <i>Gymnadenia conopsea</i>      | China       |
| <a href="#">MW854608</a>  | <i>Ceratobasidium</i> sp.                           | OTU P                 | <i>P. scabra</i> W217           | Australia   |
| <a href="#">MW854582</a>  | <i>Ceratobasidium</i> sp.                           | OUT_P                 | <i>P. mutica</i> QLD12          | Australia   |
| <a href="#">MN006068</a>  | <i>Ceratobasidium</i> sp.                           | OTU_275               | <i>Gymnadenia conopsea</i>      | Australia   |
| <a href="#">MN006062</a>  | <i>Ceratobasidium</i> sp.                           | OUT_177               | <i>G. conopsea</i>              | China       |
| <a href="#">MW854581</a>  | <i>Ceratobasidium</i> sp.                           | OUT P                 | <i>Pterostylis mutica</i> QLD11 | Australia   |
| <a href="#">MW854580</a>  | <i>Ceratobasidium</i> sp.                           | OUT P                 | <i>P. mutica</i> QLD9           | Australia   |
| <a href="#">MW854560</a>  | <i>Ceratobasidium</i> sp.                           | OUT P                 | <i>P. dolichochila</i> Pdolich  | Australia   |

\**Rtul* Probe TTTGCGGATTCACGTCC
