# Supplementary material for: Detection and Molecular Phylogenetic-Morphometric Characterization of Rhizoctonia tuliparum, Causal Agent of Gray Bulb Rot of Tulips and Bulbous Iris
Source: MDPI journal article supplement (doi:10.3390/jof8020163), 2022-02-08
Supplement: s1 [file s1]

**Table S4.** Base-pairing in the ITS2 RNA secondary structures and the conserved terminal loop sequences of the European (EU191041) and Whetzel (MH854847) isolates of *R. tuliparum* with respect to the Washington isolate (KX767078).

|                        | <b>Mutation<br/>in Helix I</b> | <b>Effect on<br/>helix I</b> | <b>Mutation<br/>in Helix II</b> | <b>Effect on<br/>helix II</b> | <b>Mutation in<br/>Helix III</b>         | <b>Effect on<br/>helix III</b>                                 | <b>Mutation<br/>in Helix<br/>IV</b> | <b>Effect on<br/>helix IV</b> |
|------------------------|--------------------------------|------------------------------|---------------------------------|-------------------------------|------------------------------------------|----------------------------------------------------------------|-------------------------------------|-------------------------------|
| EU191041<br>(European) | None                           | No change                    | None                            | No change                     | C → A<br>(In the loop<br>region)         | Gain of an<br>A-U base<br>pair                                 | None                                | No<br>change                  |
|                        |                                |                              |                                 |                               |                                          |                                                                |                                     |                               |
| MH854847<br>(Whetzel)  | None                           | No change                    | G → C                           | Loss of a C-G<br>base pair    | C → A<br>(In the loop<br>region)         | Gain of an<br>A-U base<br>pair                                 | G → A                               | Loss of a<br>C-G base<br>pair |
|                        |                                |                              |                                 |                               | A → C<br>(pseudoknot-<br>forming region) | Loss of an<br>A-U base<br>pair needed<br>to form<br>pseudoknot |                                     |                               |
|                        |                                |                              |                                 |                               | C → G                                    | Loss of a C-<br>G base pair                                    |                                     |                               |
